# Supplementary material
Source: publisher site journal article supplement (https://www.kjim.org/upload/media/kjim-2019-292-suppl2.pdf)
Supplement: Supplementary file 1 [file kjim-2019-292-suppl2.pdf]

**Supplementary Table 1. Analysis for post-transplant adverse outcomes according to era**

| Variable       | Total outcome,<br>no. (%) | Univariable model |                | Multivariable model <sup>a</sup> |                |
|----------------|---------------------------|-------------------|----------------|----------------------------------|----------------|
|                |                           | HR (95% CI)       | <i>p</i> value | Adjusted HR (95% CI)             | <i>p</i> value |
| DCGF           |                           |                   |                |                                  |                |
| Total patients | 2,153 (14.8)              |                   |                |                                  |                |
| 2008–2010      | 789 (21.7)                | Reference         |                | Reference                        |                |
| 2011–2013      | 751 (14.7)                | 0.85 (0.77–0.94)  | 0.002          | 0.84 (0.76–0.94)                 | 0.002          |
| 2014–2016      | 613 (10.6)                | 0.90 (0.80–1.01)  | 0.07           | 0.88 (0.79–1.00)                 | 0.04           |
| Mortality      |                           |                   |                |                                  |                |
| Total patients | 719 (4.9)                 |                   |                |                                  |                |
| 2008–2010      | 299 (8.2)                 | Reference         |                | Reference                        |                |
| 2011–2013      | 270 (5.3)                 | 0.79 (0.66–0.93)  | 0.006          | 0.70 (0.59–0.84)                 | < 0.001        |
| 2014–2016      | 150 (2.6)                 | 0.61 (0.49–0.75)  | < 0.001        | 0.46 (0.37–0.57)                 | < 0.001        |
| Graft failure  |                           |                   |                |                                  |                |
| Total patients | 2,746 (18.8)              |                   |                |                                  |                |
| 2008–2010      | 1,013 (27.8)              | Reference         |                | Reference                        |                |
| 2011–2013      | 985 (19.3)                | 0.86 (0.78–0.94)  | 0.001          | 0.83 (0.76–0.91)                 | < 0.001        |
| 2014–2016      | 748 (12.8)                | 0.85 (0.76–0.94)  | 0.002          | 0.78 (0.70–0.87)                 | < 0.001        |

HR, hazard ratio; CI, confidence interval; DCGF, death-censored graft failure.

<sup>a</sup>The multivariable model was adjusted with age (continuous), sex, history of hypertension, diabetes mellitus, previous dialysis method (preemptive, hemodialysis, peritoneal dialysis, both or other).
